# Supplementary material for: Chemoproteomics reveals Sofalcone inhibits the inflammatory response of Caco-2 cells by covalently targeting HMGB1
Source: Royal Society of Chemistry journal article supplement (doi:10.1039/d3cc00577a), 2023-01-01

## Supplemental materials

### Supplementary Figure uncropped images of original western blots

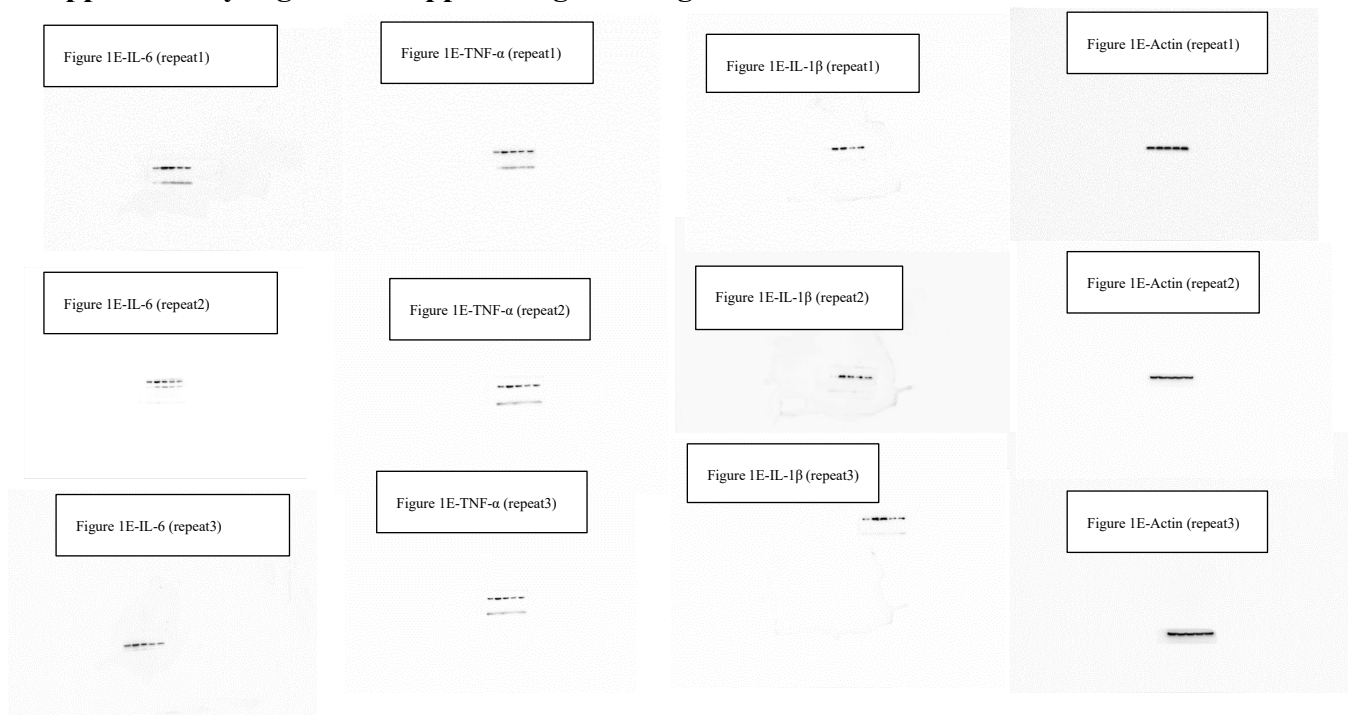

Figure 3A-Output HMGB1 (repeat1)

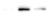

Figure 3A-Input HMGB1 (repeat1)

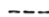

Figure 3A-Input actin (repeat1)

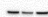

Figure 3A-Output HMGB1 (repeat2)

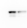

Figure 3A-Input HMGB1 (repeat2)

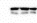

Figure 3A-Input actin (repeat2)

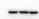

Figure 3A-Output HMGB1 (repeat3)

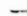

Figure 3A-Input HMGB1 (repeat3)

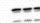

Figure 3A-Input actin (repeat3)

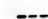

Figure 3C HMGB1 (repeat1)

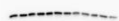

Figure 3C Actin (repeat1)

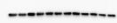

Figure 3C HMGB1 (repeat2)

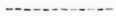

Figure 3C Actin (repeat2)

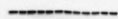

Figure 3C HMGB1 (repeat3)

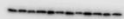

Figure 3C Actin (repeat3)

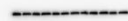

Figure 4A-TNF- $\alpha$  (repeat1)

100 kDa

Figure 4A-TNF- $\alpha$  (repeat2)

100 kDa

Figure 4A-TNF- $\alpha$  (repeat3)

100 kDa

Figure 4A-IL-6 (repeat1)

100 kDa

Figure 4A-IL-6 (repeat2)

100 kDa

Figure 4A-IL-6 (repeat3)

100 kDa

Figure 4A-NF- $\kappa$ B p-p65 (repeat1)

100 kDa

Figure 4A-NF- $\kappa$ B p-p65 (repeat2)

100 kDa

Figure 4A-NF- $\kappa$ B p-p65 (repeat3)

100 kDa

Figure 4A-Actin (repeat1)

100 kDa

Figure 4A-Actin (repeat2)

100 kDa

Figure 4A-Actin (repeat3)

100 kDa

Figure 4B-TLR4 (repeat1)

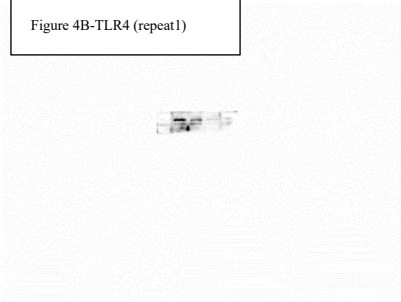

Figure 4B-RAGE (repeat1)

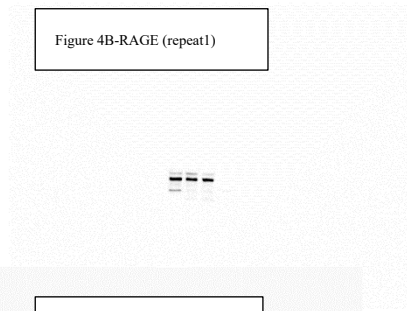

Figure 4B-TLR4 (repeat2)

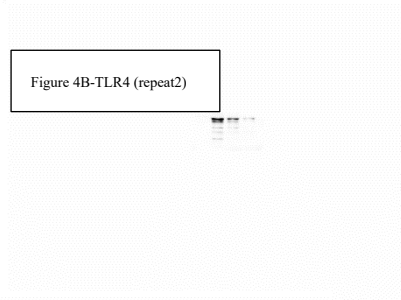

Figure 4B-RAGE (repeat2)

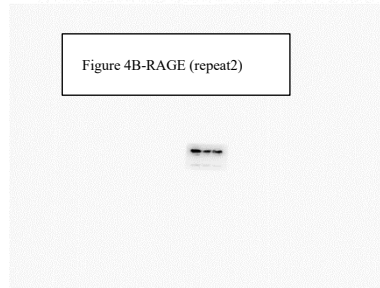

Figure 4B-TLR4 (repeat3)

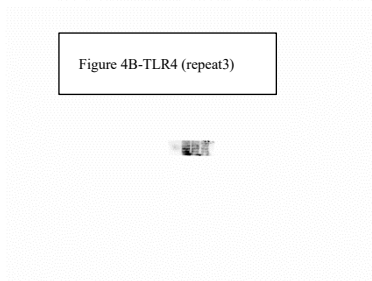

Figure 4B-RAGE (repeat3)

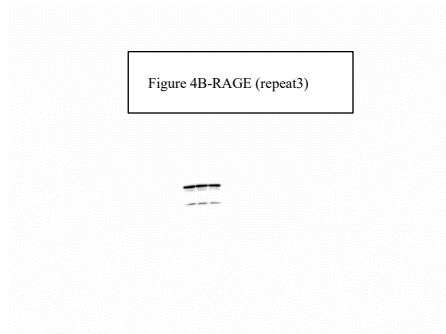

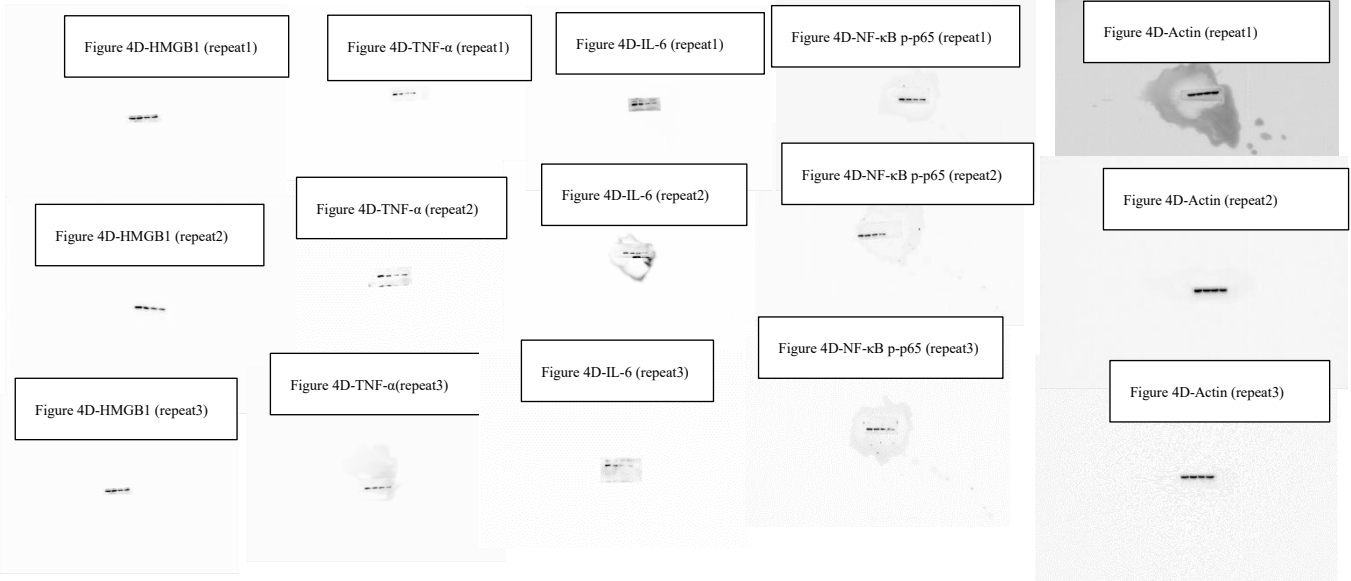

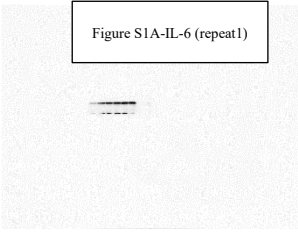

Figure S1A-Actin (repeat1)

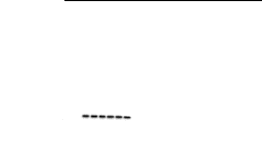

Figure S1B-IL-6 (repeat1)

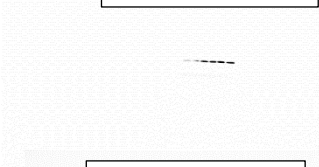

Figure S1B-Actin (repeat1)

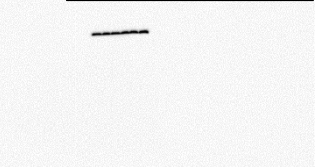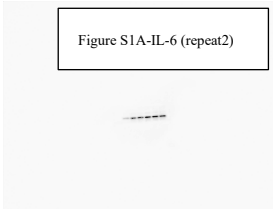

Figure S1A-Actin (repeat2)

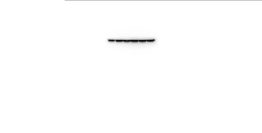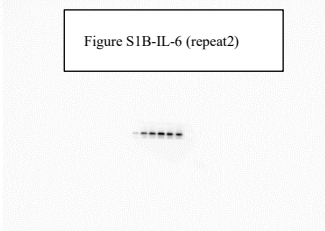

Figure S1B-Actin (repeat2)

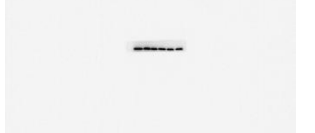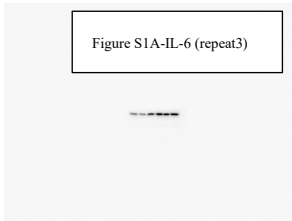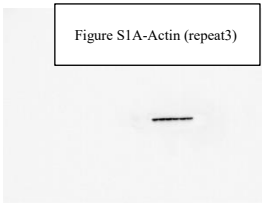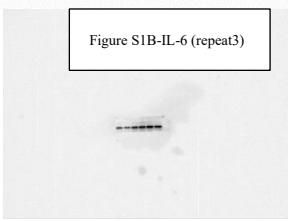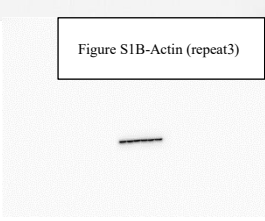

Figure S12-HMGB1 (repeat1)

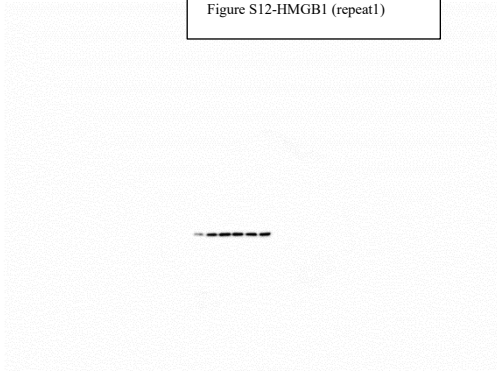

Figure S12-Actin (repeat1)

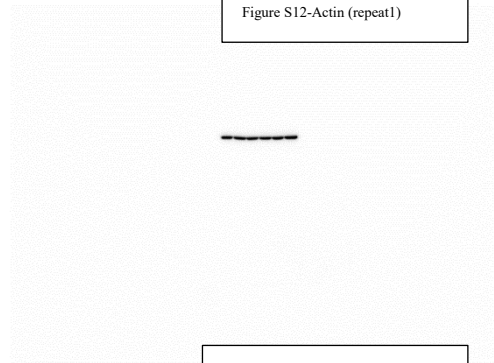

Figure S12-HMGB1 (repeat2)

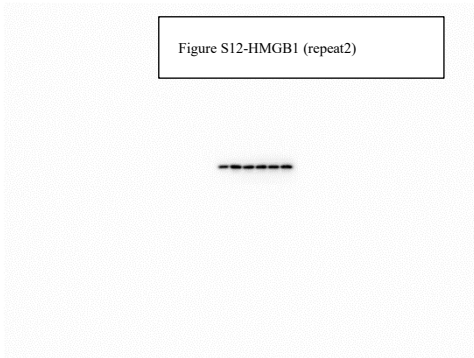

Figure S12-Actin (repeat2)

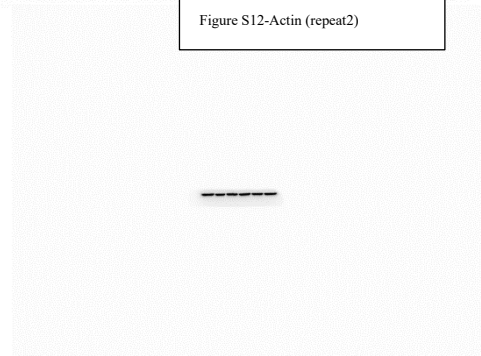

Figure S12-HMGB1 (repeat3)

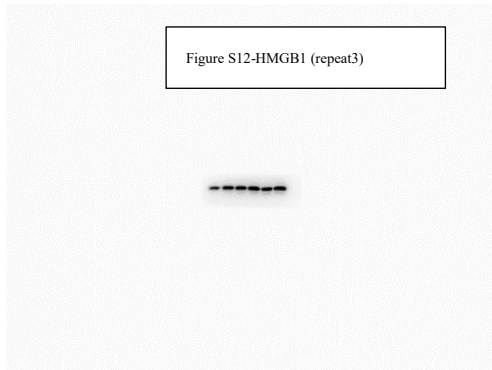

Figure S12-Actin (repeat3)

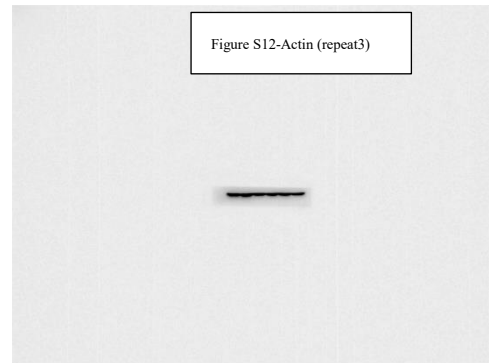

Figure S13-IL-6 (repeat1)

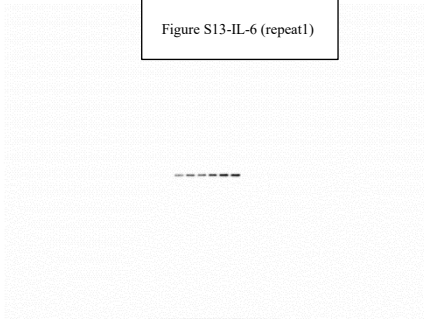

Figure S13-Actin (repeat1)

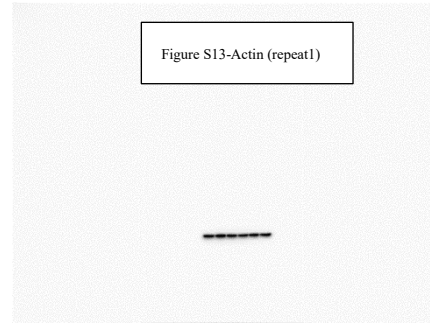

Figure S13-IL-6 (repeat2)

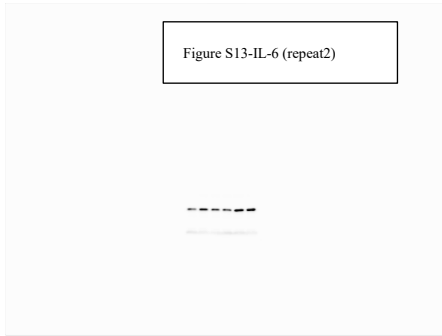

Figure S13-Actin (repeat2)

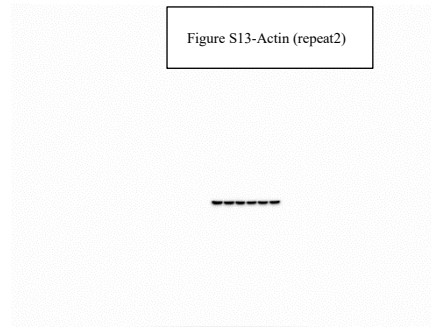

Figure S13-IL-6 (repeat3)

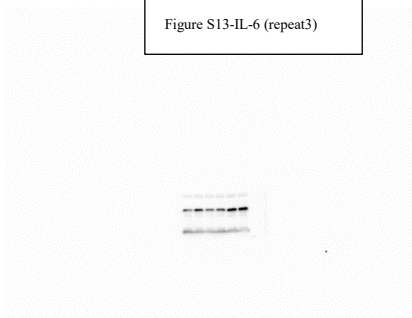

Figure S13-Actin (repeat3)

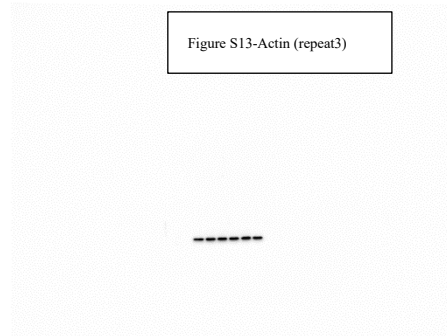

Supplement: d3cc00577a2.pdf [file d3cc00577a2.pdf]
